# Supplementary material
Source: PubMed Central journal article supplement (PMC2816619)

## SUPPLEMENTARY INFORMATION

### Supplementary Material and Methods

#### *Plasmids*

Plasmids used in the study are described in **Table S1**. Site-directed mutagenesis was performed by PCR to introduce desired mutations in the Nix constructs. The correctness of the DNA sequence was verified by sequencing.

#### *Antibodies and reagents*

The following antibodies were used in the study: mouse monoclonal anti-Nix (Sigma, 1:4000); mouse monoclonal anti-Flag M2 (Sigma, 1:10,000); mouse monoclonal anti-GST (Santa Cruz Biotechnology; 1:3000); rabbit polyclonal anti-GFP (Clontech, 1:1000); anti-LC3 (a kind gift from Z. Elazar). Secondary HRP conjugated antibodies, goat anti-mouse and goat anti-rabbit IgGs were used for immunoblotting. Donkey anti-mouse Cy3-conjugated secondary antibody (Jackson Immuno Research) was used for immunofluorescence studies. Mitotracker Deep Red 633nm (MTDR) (Invitrogen) was used as a marker of mitochondria in confocal microscopy. Carbonylcyanide 3-Chlorophenylhydrazone (CCCP) (Sigma) was applied to cells at a final concentration of 10  $\mu$ M and Rotenone (Sigma) - at a final concentration of 5  $\mu$ M for 3 hrs.

#### *Yeast re-transformation assay*

Y190 yeast clones expressing UBLs were transformed with plasmids encoding interaction partners (**Table S1**). Colonies were plated on selective media and  $\beta$ -galactosidase assay was performed using X-gal as a substrate.

### *Preparation of GST-fusion proteins*

GST fusions of various proteins (**Table S1**) were expressed in BL21 *E. coli*. Fusion protein expression was induced by adding 0.5 mM IPTG for 4 hrs. Bacteria were lysed in 20 mM Tris-HCl, pH7.5, 10 mM EDTA, pH8.0, 5 mM EGTA, 150 mM NaCl supplemented with 2 mg/ml lysozyme. GST fusion proteins were subsequently bound to pre-washed Glutathione-Sepharose 4B beads (GE Healthcare). After several washes, fusion protein-bound beads were used directly in binding assays.

### *GST pull-down assay*

HEK293 or COS7 cells were transfected with expression constructs encoding the protein of interest using Lipofectamine2000 (Invitrogen). 24-36 hrs post-transfection cells were lysed in 50 mM HEPES, pH7.5, 150 mM NaCl, 1 mM EDTA, 1 mM EGTA, 10% glycerol, 1% Triton X-100, 25 mM NaF, 50 mM ZnCl<sub>2</sub> and lysates were incubated overnight with immobilized GST-fusion proteins. Following 5 washes, beads with co-precipitated proteins were resuspended in 2x SDS-PAGE loading buffer, boiled and loaded onto 10% or 12% SDS-PAGE gels for analysis.

### *Immunoprecipitation*

For the immunoprecipitation experiments HeLa cells were lysed in ice-cold lysis buffer (50 mM Tris-HCl pH 7.5, 150 mM NaCl, 1 mM MgCl<sub>2</sub>, 0,1% SDS) supplemented with protease inhibitor cocktail (Roche). The lysates were pre-cleared by 15 minutes centrifugation at 2.500 rpm in a microcentrifuge at 4°C. To the cleared lysate monoclonal

anti-Nix was added and rotated overnight at 4°C. Immunocomplexes collected by adding 20 µl of protein A conjugated agarose bead solution (Santa Cruz Biotechnology) for one hour and washed in lysis buffer for five times. Finally, beads were resuspended in 20 µl 2x SDS-PAGE gel load buffer, boiled and detected by immunoblot analysis using chemoluminescence based detection.

*Nuclear Magnetic Resonance (NMR) spectroscopy and Isothermal Titration Calorimetry (ITC)*

Unlabeled and labeled (<sup>15</sup>N or <sup>13</sup>C-<sup>15</sup>N) human Atg8 protein family members were expressed as GST-fusion proteins in DH5α *E. coli* in LB or M9 media. Proteins were isolated by glutathione affinity chromatography, cleaved from the GST moiety by thrombin treatment and purified by size-exclusion chromatography. Proteins were equilibrated in 25 mM NaPi, 150 mM NaCl buffer, pH7.5. The solid-phase synthesized, lyophilized peptides p62-LIR, Nix-W139/143 and Nix-W35 were solubilized in 25 mM NaPi, 150 mM NaCl buffer, pH7.5 to prepare stock solutions. Titration of <sup>15</sup>N-labeled proteins (~100µM) with p62-LIR1, Nix-W35 and Nix-W139/143 was performed at 25°C by gradually adding stock solutions of unlabeled peptides. To monitor binding-induced changes in protein resonances, <sup>15</sup>N-<sup>1</sup>H HSQC-TROSY spectra were recorded on Bruker Avance spectrometers operating at proton frequencies 600 and 700 MHz. Three residues were selected to represent areas in proximity to HP1 (I34), HP2 (R70) and distant to both (G/Q85). The exact positions of these residues are shown in **Fig. S1B**. For these residues, individual  $K_D$  were calculated according to (Eldridge et al., 2002). For ITC, proteins were equilibrated in 25 mM NaPi, 150 mM NaCl buffer, pH7.5. For LC3/p62-LIR

experiments, 400  $\mu$ M p62-LIR was titrated into 15  $\mu$ M LC3 in 26 steps (10  $\mu$ L per injection). For Nix peptides, 1.6 mM Nix-W35 was titrated into 80  $\mu$ M LC3, and 2 mM Nix-W139/143 was titrated into 100  $\mu$ M LC3 in 16 steps (15  $\mu$ L per injection).

### *Laser Scanning Microscopy*

Approximately  $2 \times 10^5$  cells were seeded, grown on coverslips and transfected with either Wt or W35A Nix-Flag constructs using Fugene HD according to manufacturers' instructions. 24hrs post transfection, cells were pulsed with 200 nM Mitotracker Deep Red 633nm (Invitrogen) for 45 min. Cells were then washed twice with PBS and treated accordingly. Post-treatment cells were immediately fixed in 2% paraformaldehyde. Subsequently, cells were permeabilized with a 0.2% Triton X-100 solution in PBS at room temperature for 20 min. All cells were blocked in PBS containing 5% BSA at 4 °C overnight. Primary and secondary antibodies were diluted in the blocking solution, and washes were performed in 0.1% Tween 20 in PBS. Coverslips were mounted on 20  $\mu$ l of aqueous mounting medium (Biomed) placed on a glass holder. Image analysis and plot profiles were generated using the ImageJ software (<http://rsbweb.nih.gov/ij/>). In more detail, the co-localization highlighter was used (part of the WCIF ImageJ) to highlight the points of Nix and GFP-GABARAP-L1 co-localization (Fig.3A&B, white dots). Thresholds were determined using the mean intensity of each channel and calculated as 3x standard deviation. These data were factored into the co-localization program.

### *Retroviral-mediated gene transfer of Nix into Nix<sup>-/-</sup> mice*

Wt and mutant Nix cDNAs were subcloned into the retroviral vector MSCV-Ires-GFP. To make viral producer cells,  $1 \times 10^6$  293T cells were plated in a 10 cm dish, and transfected with 10  $\mu$ g of plasmid DNA (4  $\mu$ g viral DNA, 4  $\mu$ g pEQ-Pam3 (-Env), and 2  $\mu$ g pSR $\alpha$ G, or equivalent VSV-G envelope) (Persons et al., 2003) and 30  $\mu$ l Fugene 6. Next,  $1 \times 10^5$  GPE86 (+) cells were plated in a 10 cm dish. Every 12 hours viral supernatant from the transfected 293T cells was harvested, filtered, and applied to the GPE86 (+) cells, with 6 mg/ml polybrene (Sigma, St. Louis, MO), for a total of 6 applications. After the sixth application, the GPE86 (+) cells were harvested, sorted for GFP expression (highest 50% of expressing cells), and re-plated. Donor *Nix*<sup>-/-</sup> mice were prepared by a single intraperitoneal injection of 150 mg/kg 5-FU. Four days after administration of 5-FU, the virus producer cells were irradiated (3,000 rad), and  $4 \times 10^6$  cells were plated in a 10 cm dish that had been coated with 1% gelatin. The following day, bone marrow was harvested from the femurs and tibias of the donor *Nix*<sup>-/-</sup> mice. After lysis of erythrocytes (BD Biosciences, San Jose, CA), bone marrow cells were washed once with PBS, and resuspended in DMEM with 15% FBS. Next, they were plated at a density of  $1 \times 10^6$  cells/ml in 10 cm suspension dishes, and prestimulated for 36 hours with growth factors (50 ng/ml murine SCF (Peprotech Inc., Rocky Hill, NJ), 20 ng/ml murine IL-3 (Peprotech Inc., Rocky Hill, NJ), and 50 ng/ml IL-6 (BioVision Research Products, Mountain View, CA)). Following prestimulation,  $5 \times 10^5$  bone marrow cells in 5 ml of fresh medium were added to each dish of producer cells, after removal of an equal volume of medium. Growth factors (the same as during prestimulation) and 6  $\mu$ g/ml polybrene were added, and the cells were co-cultured for 36

hours. After co-culture, the transduced bone marrow cells were harvested and the cells from each dish used to transplant 3 lethally-irradiated (1000 rad) wild-type recipient mice.

#### *Analysis of mitochondrial clearance*

Reticulocytosis was induced by phenylhydrazine treatment, and reticulocyte-enriched blood was cultured and stained with MitoTracker Red, as previously described (Zhang et al., 2009a). Mitochondrial clearance was assessed in the GFP-positive fraction, which corresponds to virally transduced cells, with a BD LSR II flow cytometry analyzer, after excluding a minor autofluorescent cell population that arises from the phenylhydrazine treatment.

#### **Supplementary references**

- Eldridge, A.M., Kang, H.S., Johnson, E., Gunsalus, R. and Dahlquist, F.W. (2002) Effect of phosphorylation on the interdomain interaction of the response regulator, NarL. *Biochemistry*, **41**, 15173-15180.
- Ichimura, Y., Kumanomidou, T., Sou, Y.S., Mizushima, T., Ezaki, J., Ueno, T., Kominami, E., Yamane, T., Tanaka, K. and Komatsu, M. (2008) Structural basis for sorting mechanism of p62 in selective autophagy. *J Biol Chem*, **283**, 22847-22857.

## Supplementary figure legends

**Figure S1.** *Isothermal Titration Calorimetry (ITC) and Nuclear Magnetic Resonance (NMR) analyses of the interaction of Nix-LIR peptides with LC3 proteins.* **A.** LIR peptides used in the study. **B.** The top diagrams display the raw measurement data and the bottom diagrams show the integrated heat per titration step. All titration experiments with indicated LIR peptide:LC3 protein pairs were performed with 150 mM NaCl at 25° C. **C.**  $K_D$  values, as calculated from CSP data for selected LC3A and LC3B resonances (I34, R70 and G/Q85 **Fig. S1D**, left plot) upon titration with Nix–LIR peptides. **D.** Left plot: structure of the LC3B:p62 complex (PDB ID 2ZJD, (Ichimura et al., 2008)). The residues selected for  $K_D$  calculations are shown in cyan. Right plot: CSP mapping of p62-LIR on LC3B structure (all residues whose resonances show “two-state” transition are marked red). **E.** The SCP for Nix-W35 (bottom, left) and Nix-W139/143 (bottom, right) were categorized as followed: below 0.03/0.04 ppm – gray, 0.03/0.04 ppm – 0.08/0.10 ppm – yellow, bigger than 0.08/0.10 ppm – red (for Nix-W35 and Nix-W139/143, respectively).

**Figure S2.** *Nix recruits EGFP-GABARAP-L1 to stressed mitochondria in HeLa cells.* **A., B.** HeLa cells co-transfected with EGFP-GABARAP-L1 and Wt-Nix (**A.**) or Nix W35A (**B.**) were incubated with and without mitochondrial poisons (rotenone and CCCP) for 3 hrs. Cells were then fixed and analyzed for the co-localization between mitochondria (MTR), EGFP-GABARAP-L1 and Nix (stained with anti-Nix-Cy3 antibody). **C.** Quantification was achieved by counting the number of complete co-localizations (EGFP/Cy3/Mito) per cell for approximately 100 cells per condition. Results are

expressed as a fold change in Wt-Nix, control treated cells. Error bars reflect Standard Error of Mean (SEM). . Levels of endogenous and overexpressed Wt-Nix or Nix-W35A.

**Figure S3.** *EGFP-GABARAP-L1 co-localization with MitoTracker in Nix<sup>+/+</sup> and Nix<sup>-/-</sup> cells.* **A.** *Nix<sup>+/+</sup>* or **B.** *Nix<sup>-/-</sup>* cells co-transfected with EGFP-GABARAP-L1 and Wt-Nix were incubated with and without mitochondrial poisons (rotenone and CCCP) for 3 hrs. Cells were then fixed and analyzed for the co-localization between mitochondria (MTR) and EGFP-GABARAP-L1. **C.** Quantification was achieved by counting the number of complete co-localizations EGFP/MTR per cell for approximately 30 cells per condition. Results are expressed as a fold change.

**Figure S4.** *Role of Nix and ubiquitin in mitophagy.* Mitochondrion-localized Nix interacts via its N-terminal LIR with LC3/GABARAP-conjugated to the autophagosome thereby mediating tethering of the nascent autophagosome to the target mitochondrion. Concomitant ubiquitination of a mitochondrion-localized substrate protein may, via Ub-binding autophagy receptors (p62 and NBR1), further increase tethering of mitochondrial and autophagosomal membranes.

**Table S1.** Plasmids used in the study.

| Vector               | Description                                             | Source     |
|----------------------|---------------------------------------------------------|------------|
| pACT2                | Y2H prey vector                                         | Clontech   |
| pACT2-ATG4A(245-336) | Y2H prey vector encoding C-terminal part of human ATG4A | this study |
| pACT2-ATG4B(58-393)  | Y2H prey vector encoding C-terminal part of             | this study |



|                                       |                                                        |                        |
|---------------------------------------|--------------------------------------------------------|------------------------|
|                                       | human ATG4B                                            |                        |
| pACT2-NBR1(691-966)                   | Y2H prey vector encoding C-terminal part of human NBR1 | (Kirkin et al., 2009)  |
| pACT2-p62(311-444)                    | Y2H prey vector encoding C-terminal part of human p62  | (Kirkin et al., 2009)  |
| pACT2-Nix                             | Y2H prey vector encoding full-length human NIX         | this study             |
| pcDNA3.1(-)/Flag-Nix                  | Flag-tagged mouse Nix                                  | (Yussman et al., 2002) |
| pcDNA3.1(-)/Flag-Nix(W35A)            | Flag-tagged mouse Nix, W35 mutated to Ala              | this study             |
| pcDNA3.1(-)/Flag-Nix(W139A)           | Flag-tagged mouse Nix, W139 mutated to Ala             | this study             |
| pcDNA3.1(-)/Flag-Nix(W143A)           | Flag-tagged mouse Nix, W143 mutated to Ala             | this study             |
| pcDNA3.1(-)/Flag-Nix(W35A&L38A)       | Flag-tagged mouse Nix, W35 and L38 mutated to A        | this study             |
| pcDNA3.1(-)/Flag-Nix( $\Delta$ 35-38) | Flag-tagged mouse Nix, $\Delta$ LIR ( $\Delta$ WVEL)   | this study             |
| pcDNA3.1(-)/Flag-Nix( $\Delta$ 39)    | Flag-tagged mouse Nix, $\Delta$ N-term                 | this study             |
| pGEX-4T-1/Nix( $\Delta$ TM)           | GST-tagged mouse Nix, $\Delta$ C-term (1-182)          | this study             |
| pGEX-4T-1/scAtg8                      | GST-tagged Atg8 (from <i>S. cerevisiae</i> )           | (Kirkin et al., 2009)  |
| pGEX-4T-1/hGABARAP                    | GST-tagged human GABARAP                               | (Kirkin et al., 2009)  |
| pGEX-4T-1/hGABARAP-L1                 | GST- tagged human GABARAP-L1                           | (Kirkin et al., 2009)  |
| pGEX-4T-1/hGABARAP-L2                 | GST-tagged human GABARAP-L2                            | (Kirkin et al., 2009)  |
| pGEX-4T-1/hLC3-A                      | GST-tagged human LC3-A                                 | (Kirkin et al., 2009)  |
| pGEX-4T-1/hLC3-B                      | GST-tagged human LC3-B                                 | (Kirkin et al., 2009)  |
| pGEX-4T-1/SUMO1                       | GST-tagged SUMO1                                       |                        |
| pGEX-4T-1/Ub                          | GST-tagged Ub                                          |                        |
| pGEX-4T-1                             | GST fusion expression vector                           | GE Healthcare          |
| pYTH9-SUMO1                           | Y2H bait vector encoding human SUMO-1                  | (Hecker et al., 2006)  |
| pYTH9-ATG8                            | Y2H bait vector encoding <i>S. cerevisiae</i> ATG8     | (Kirkin et al., 2009)  |
| pYTH9-LC3B                            | Y2H bait vector encoding human LC3B                    | (Kirkin et al., 2009)  |
| pYTH9-ATG12                           | Y2H bait vector encoding human ATG12                   | (Kirkin et al., 2009)  |

# Supplementary Figure S1

A.

## Synthetic peptides used:

|               |       |                         |
|---------------|-------|-------------------------|
| p62-LIR:      | 22 aa | RPEEQMESDNCSGGDDDDWTHLS |
| Nix-W35:      | 15 aa | GLNSSWVELPMNSSN         |
| Nix-W139/W143 | 16 aa | SADWVSDWSSRPENIP        |

B.

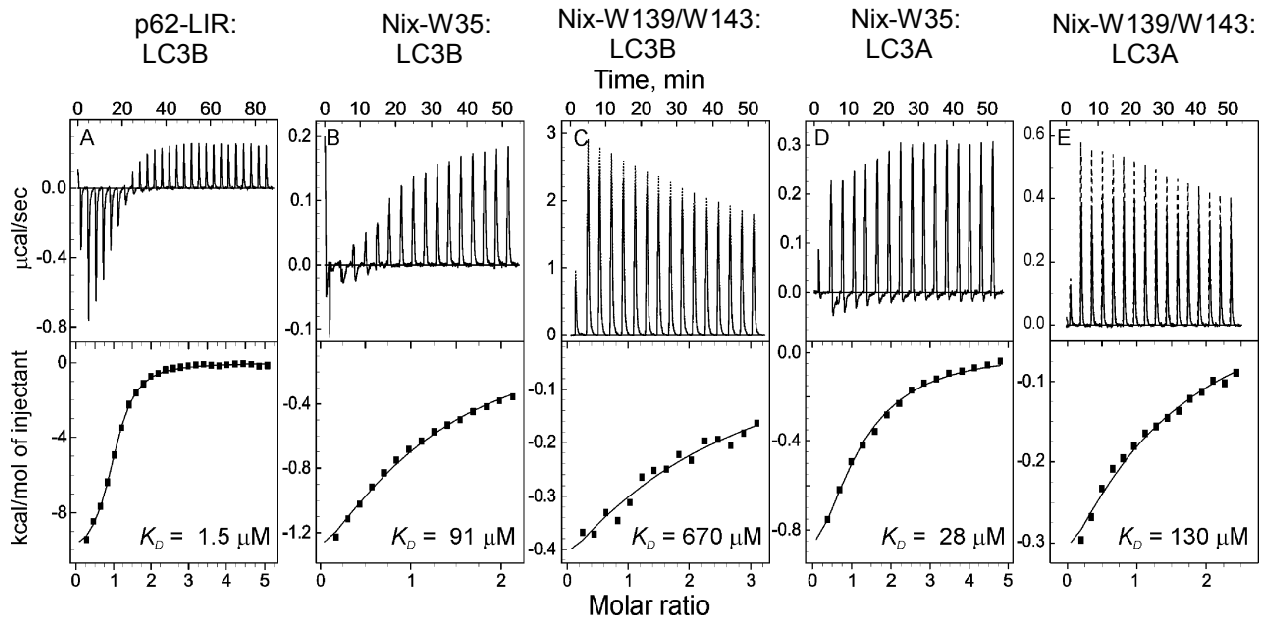

C.

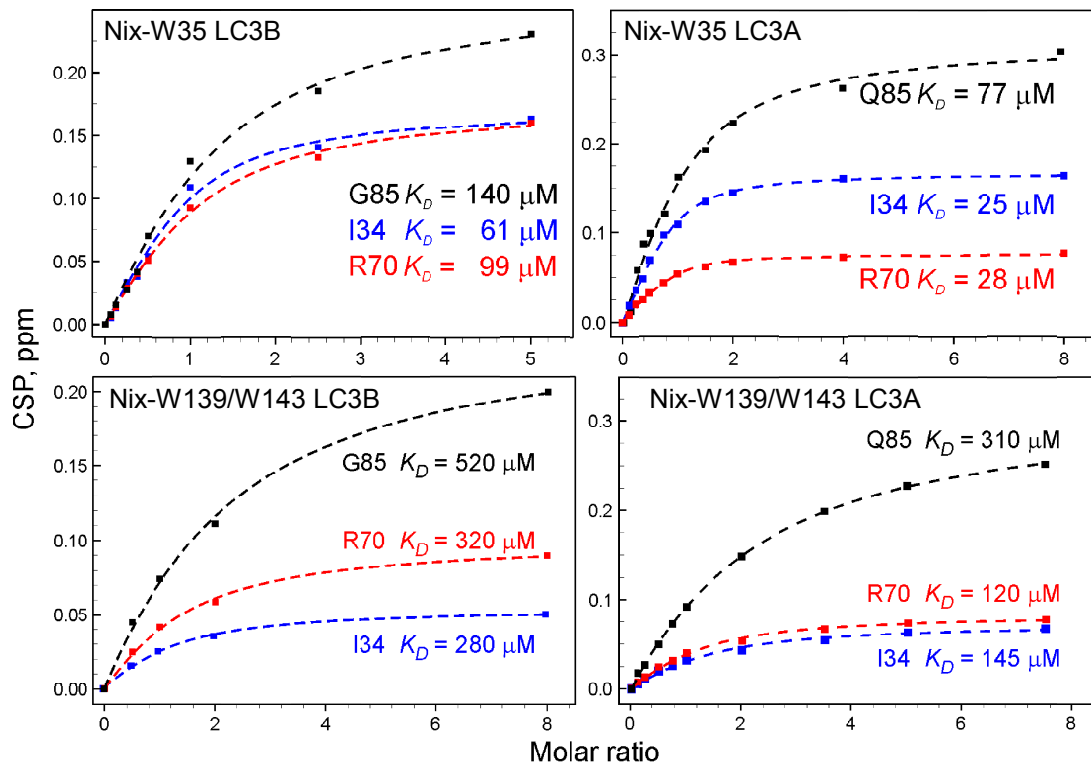

# Supplementary Figure S1

D.

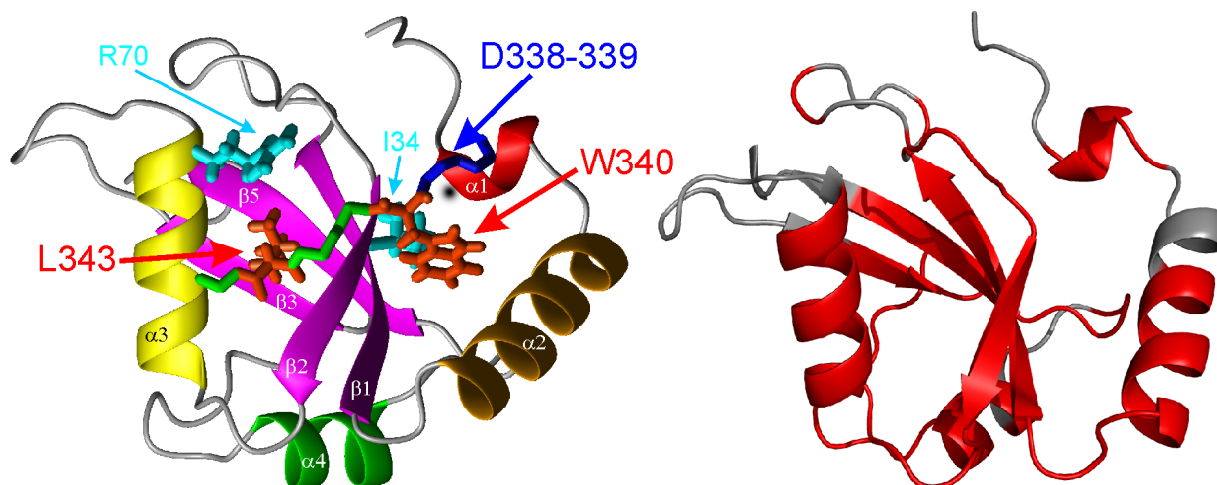

E.

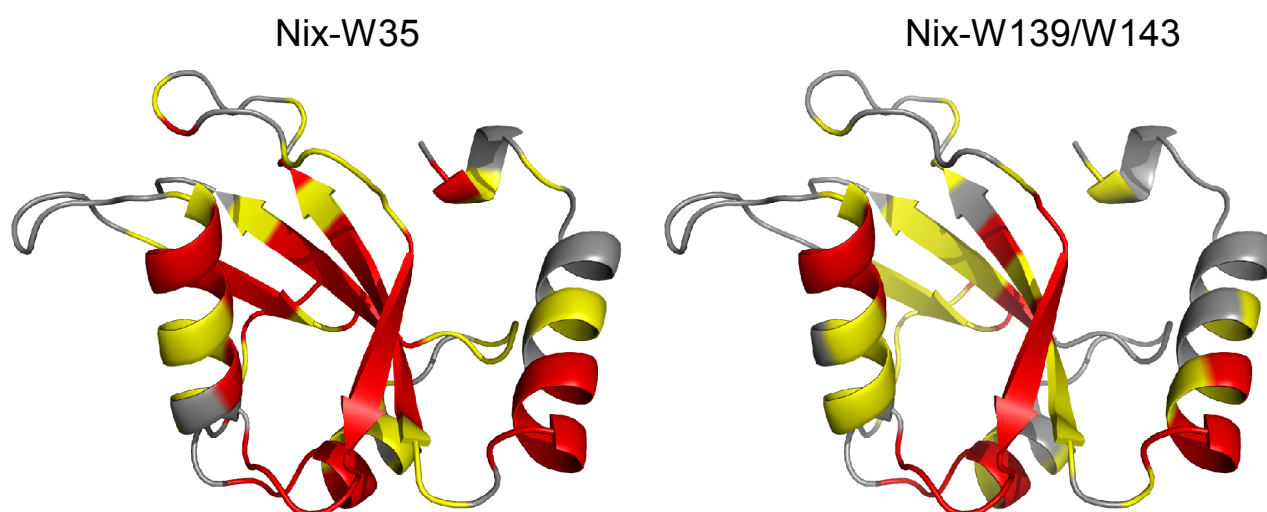

## Supplemental Figure 2

### (A) HeLa Nix-Flag Wt/EGFP-GABARAP-L1

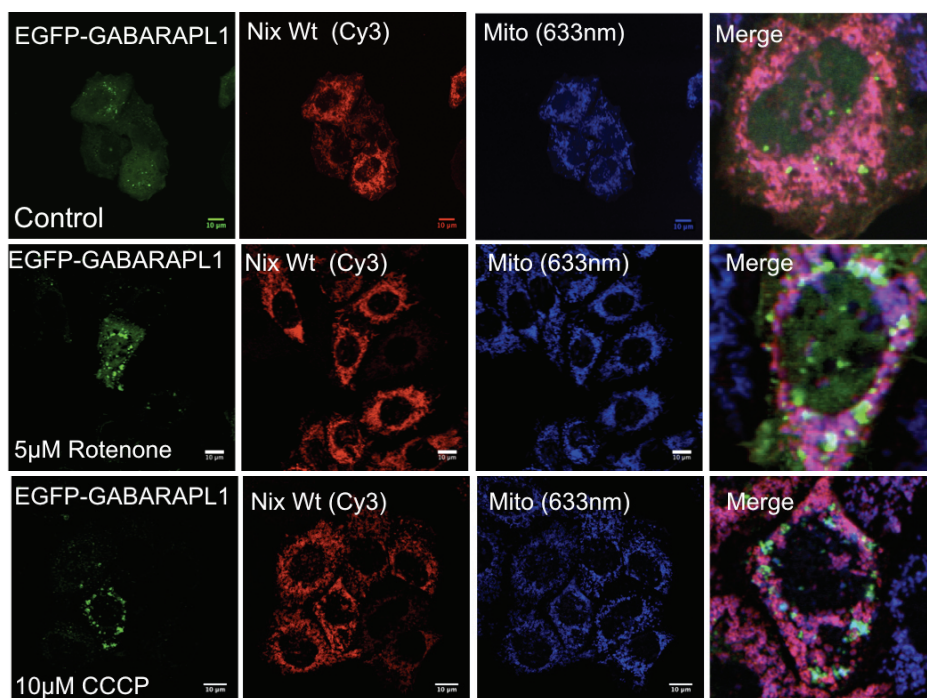

### (B) HeLa Nix-Flag W35A/EGFP-GABARAP-L1

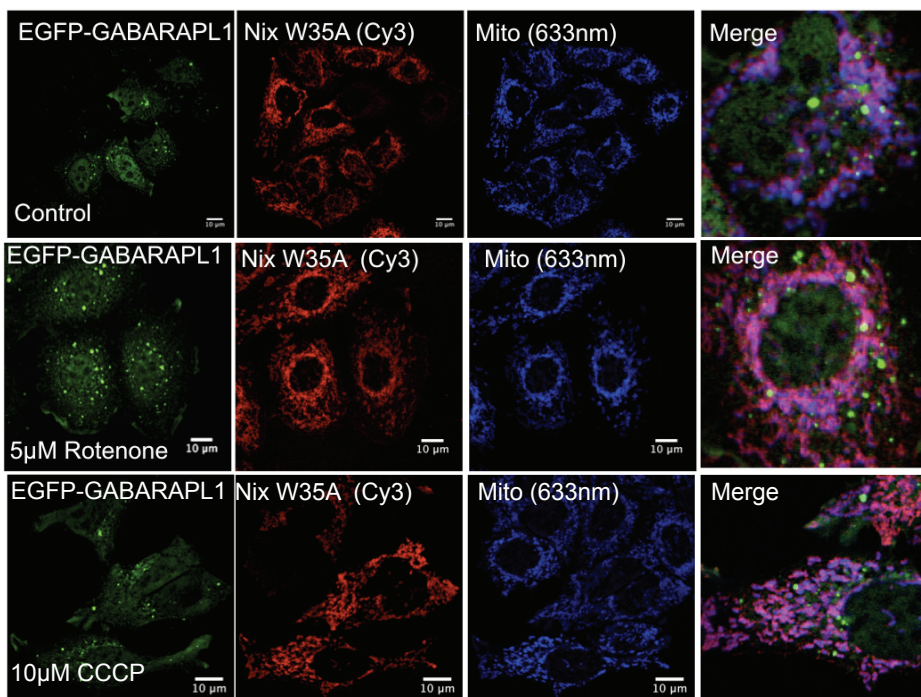

Figure S2 cont.

(C) Nix Co-localization with EGFP-GABARAP-L1 & Mitotracker in HeLa cells

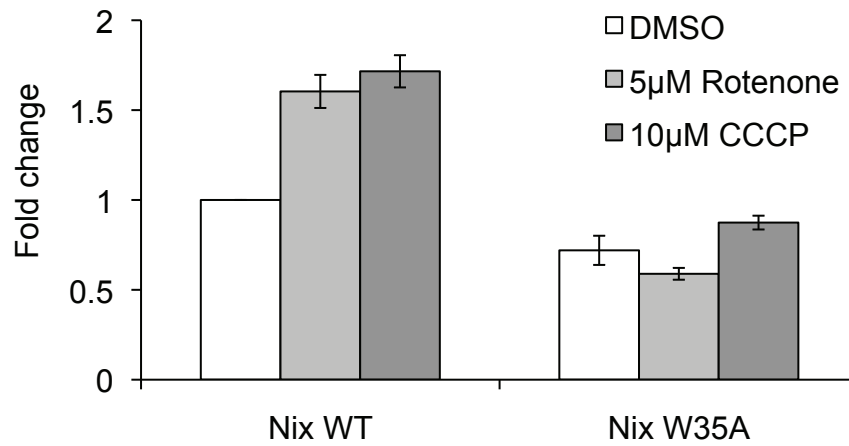

(D) Total Nix protein levels in transfected HeLa cells

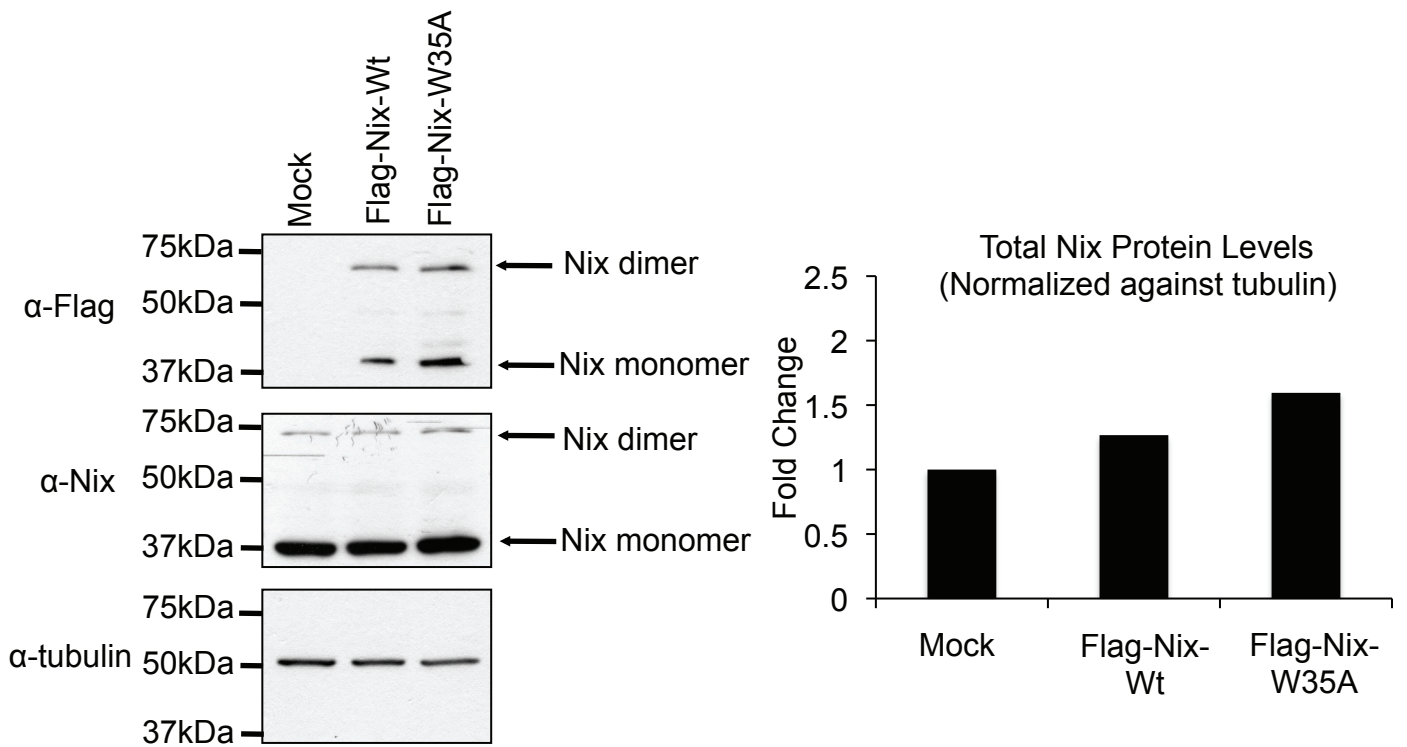

## Supplemental Figure 3

### A. *Nix*<sup>+/+</sup> MEFs EGFP-GABARAP-L1 vs Mitotracker (633nm)

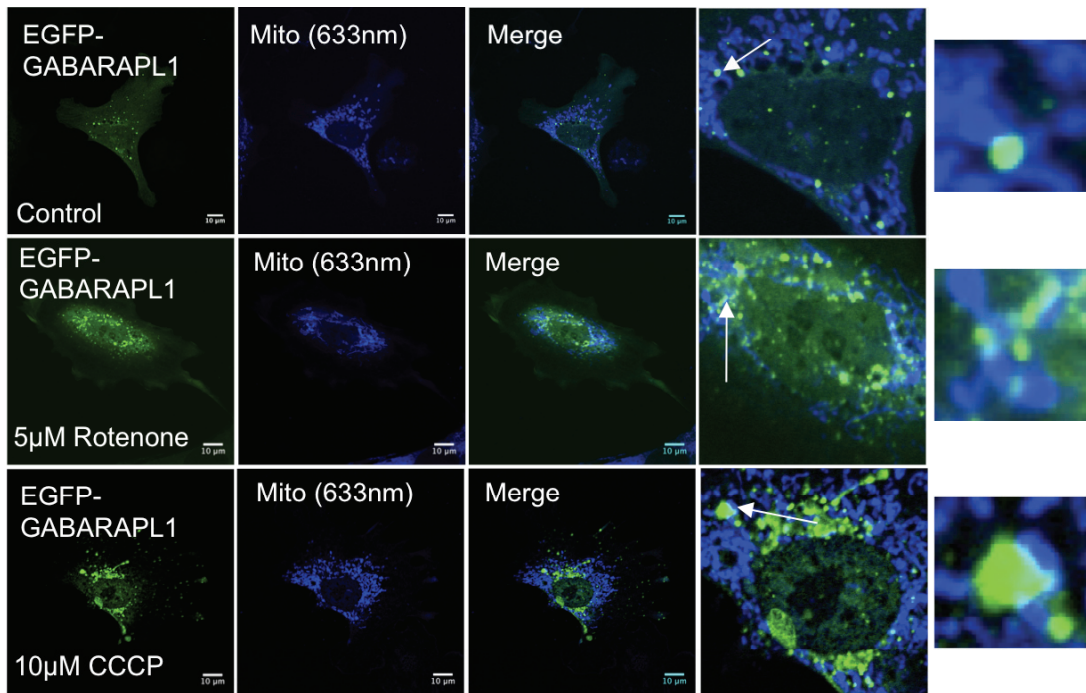

### B. *Nix*<sup>-/-</sup> MEFs EGFP-GABARAP-L1 vs Mitotracker (633nm)

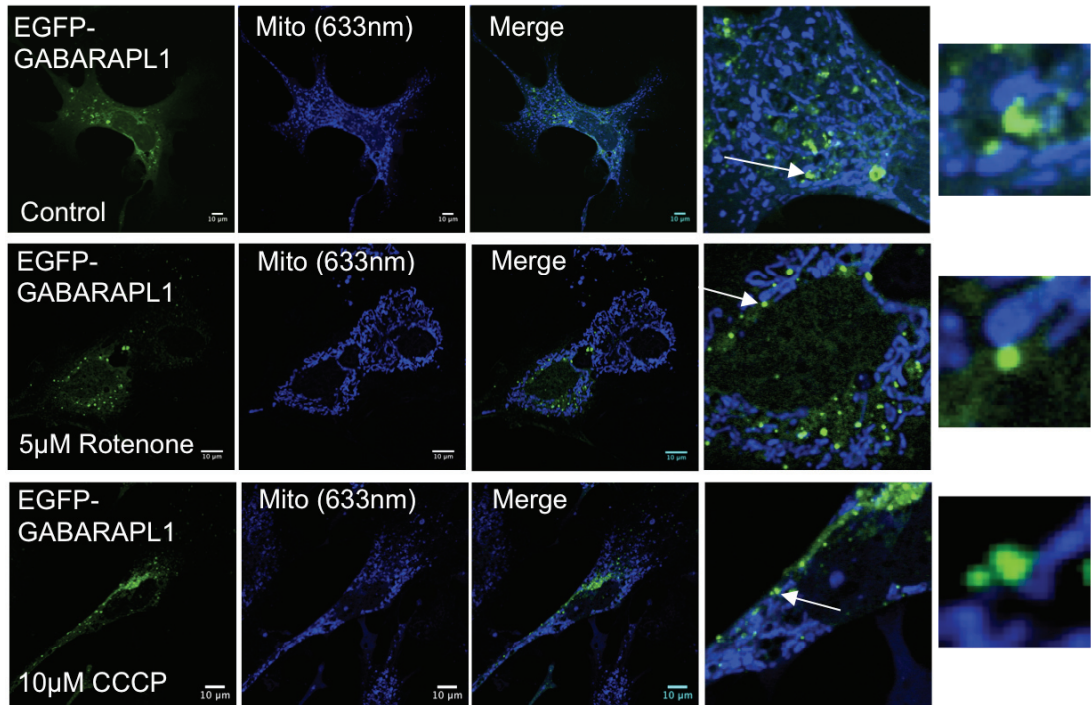

Supplemental Figure 3. cont.

**C.**

EGFP-GABARAP-L1 Co-localization vs. Mitotracker in *Nix*<sup>-/-</sup> and *Nix*<sup>+/+</sup> MEFs

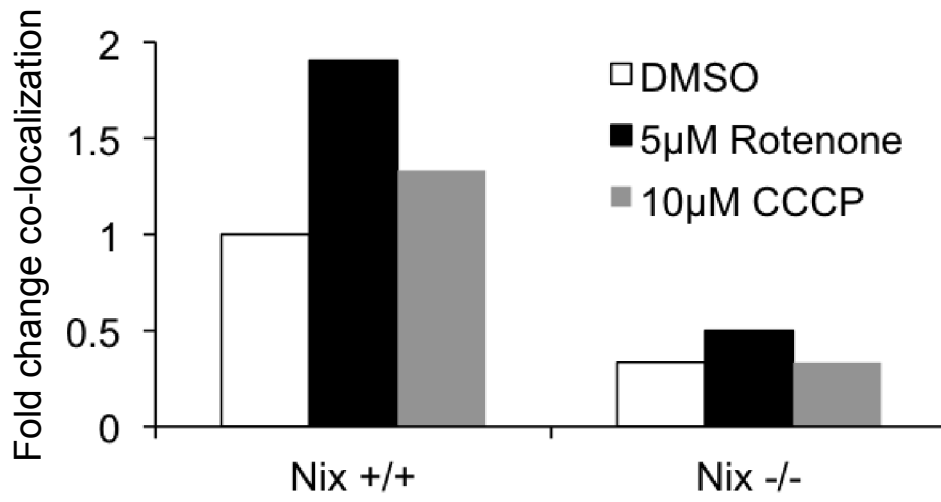

Supplementary Figure S4

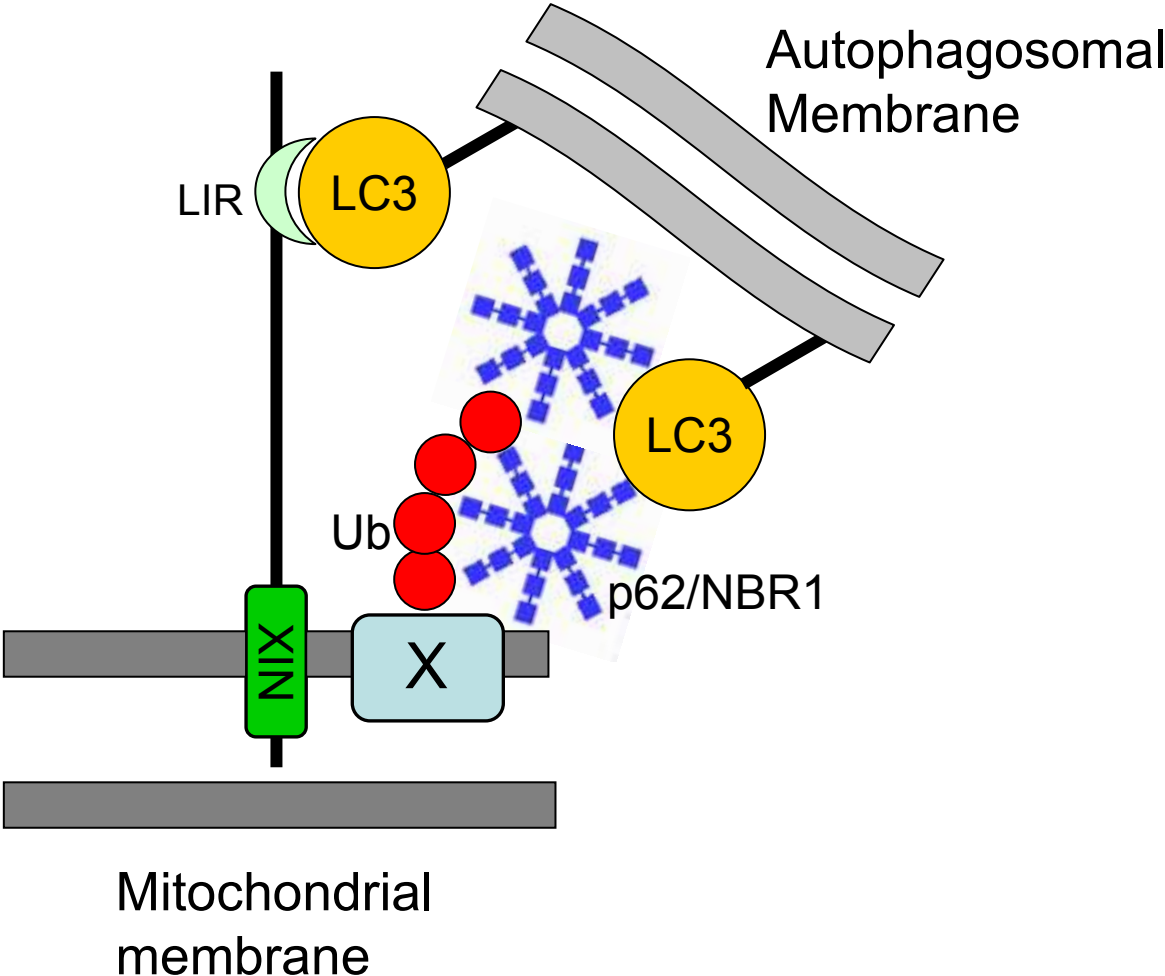

Supplement: embor2009256-s1.pdf [file embor2009256-s1.pdf]
